# Supplementary material
Source: publisher site journal article supplement (https://www.spandidos-publications.com/2772/downloadSupplementary)

Figure S1. Flow chart describing the experimental process. miR, microRNA; GDM, gestational diabetes mellitus; sh-, short hairpin RNA; TXNRD1, thioredoxin reductase 1 cytoplasmic; FBG, fasting blood glucose; NC, negative control.

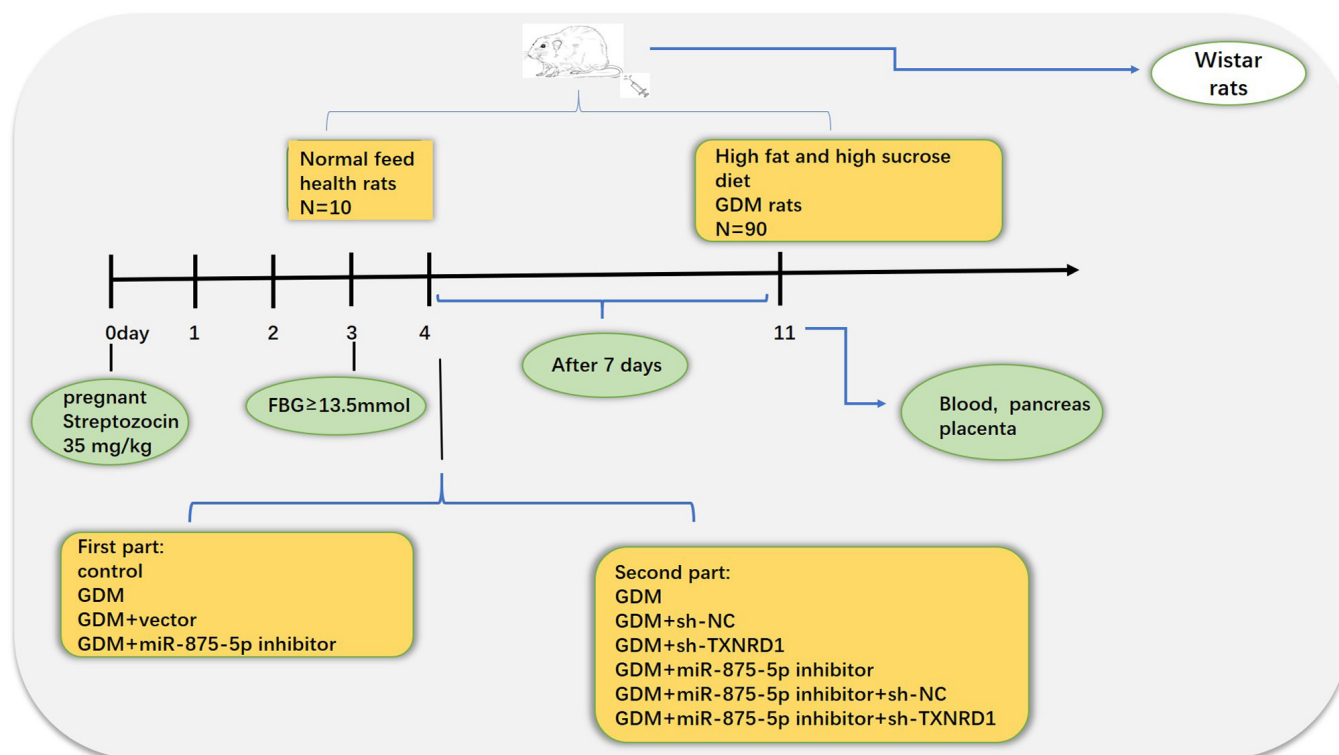

Supplement: Supplementary file 1 [file downloadSupplementary]
